# Supplementary material for: Supramolecular organogel formation triggered by acid–base interaction in two-component system consisting of l-lysine derivative and aliphatic acids
Source: Royal Society of Chemistry journal article supplement (doi:10.1039/b705888h), 2007-01-01
Supplement: b705888h.pdf [file b705888h.pdf]

## Supramolecular Organogel Formation Triggered by Acid–Base Interaction in Two–Component System Consisting of L–Lysine Derivative and Aliphatic Acids\*\*

Masahiro Suzuki,\* Hiroaki Saito, Hirofusa Shirai, and Kenji Hanabusa.

Graduate School of Science and Technology, Shinshu University, Ueda, Nagano 386-8567, Japan

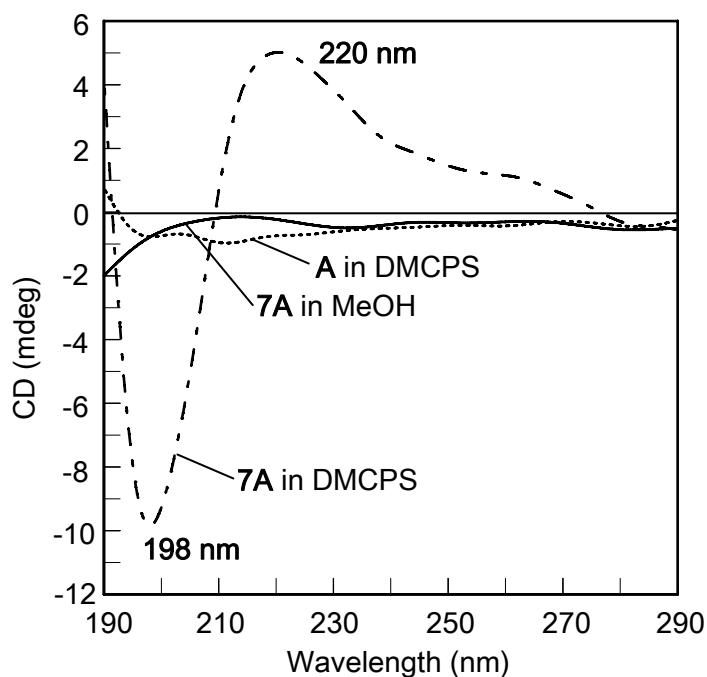

**Figure 1S.** CD spectra of 7+A in DMCPs gel (dotted) and MeOH solution (bold). [7+A] = 10 mg/mL.

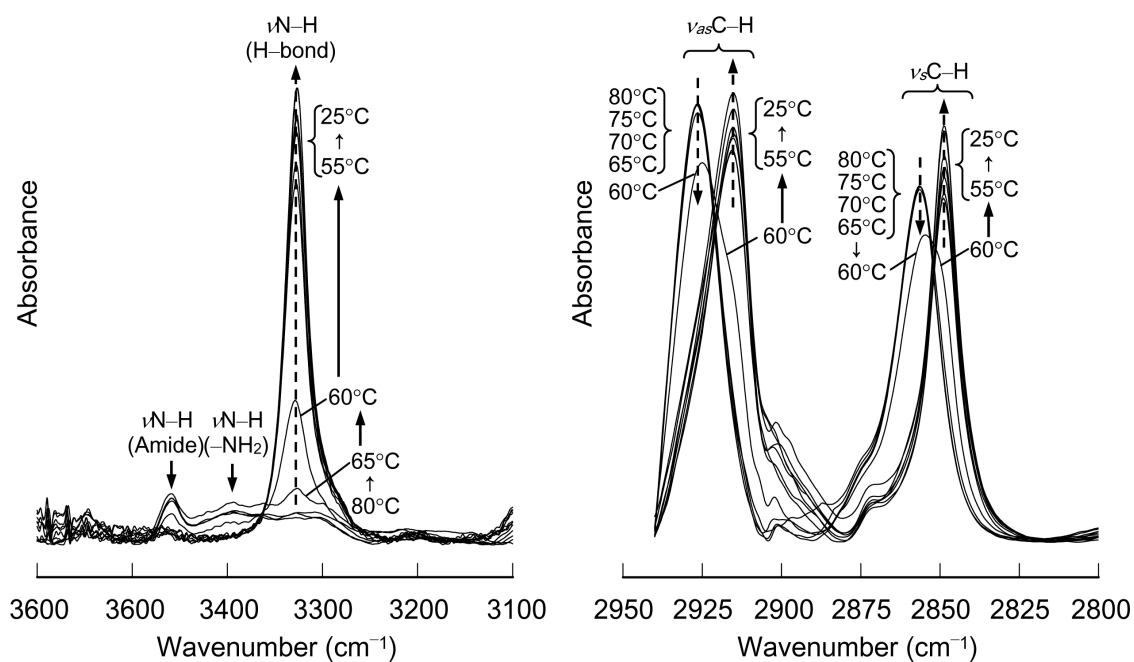

**Figure 2S.** Temperature-controlled FT-IR spectra of 7+A in DMCPs (10 g/L).
